# Supplementary material
Source: MDPI journal article supplement (https://www.mdpi.com/2411-5150/1/4/27)
Supplement: s1 [file s1]

# Supplementary material

## Material & Methods

### Procedure

**Table S1.** Experimental conditions.

| Block   | Condition    | Task        | No. of PM | No. of P | Target  | Arm   | Feedback | CP      | Prisms | CR  | Light |
|---------|--------------|-------------|-----------|----------|---------|-------|----------|---------|--------|-----|-------|
| rotated | Pretest      | HS          | -         | 5        | -       | -     | no       | central | -      | no  | off   |
|         |              | VS          | -         | 5        | -       | -     | no       | central | -      | yes | off   |
|         |              | PS          | 5         | -        | -       | right | no       | central | -      | yes | off   |
|         |              | IT          | 5         | -        | -       | left  | no       | central | -      | yes | off   |
|         | Adaptation   | AD          | 30        | -        | central | right | yes      | right   | right  | no  | off   |
|         | 1. Posttest  | see Pretest |           |          |         |       |          |         |        |     |       |
|         | Readaptation | READ        | 30        | -        | central | right | yes      | right   | -      | no  | off   |
| central | Pretest      | HS          | -         | 5        | -       | -     | no       | central | -      | no  | off   |
|         |              | VS          | -         | 5        | -       | -     | no       | central | -      | yes | off   |
|         |              | PS          | 5         | -        | -       | right | no       | central | -      | yes | off   |
|         |              | IT          | 5         | -        | -       | left  | no       | central | -      | yes | off   |
|         | Adaptation   | AD          | 30        | -        | central | right | yes      | central | right  | yes | off   |
|         | 1. Posttest  | see Pretest |           |          |         |       |          |         |        |     |       |
|         | Readaptation | READ        | 30        | -        | central | right | yes      | central | -      | yes | off   |

No. of PM: number of pointing movements; No. of P: number of pictures; CP: chair position; CR: chin rest; HS: head straight ahead; VS: visual straight ahead; PS: proprioceptive straight ahead; IT: intermanual transfer; AD: adaptation; READ: readaptation. Grey labeled conditions depict the additional condition in group IT.

**Table S2.** Experimental conditions.

| Block        | Condition    | Task | No. of PM | No. of P | Target  | Feedback | CP    | Prisms | CR | Light |
|--------------|--------------|------|-----------|----------|---------|----------|-------|--------|----|-------|
| <b>Dark</b>  | Adaptation   | AD   | 30/60/90  | -        | central | yes      | right | right  | no | off   |
|              | Readaptation | READ | 30/60/90  | -        | central | yes      | right | -      | no | off   |
| <b>Light</b> | Adaptation   | AD   | 30/60/90  | -        | central | yes      | right | right  | no | on    |
|              | Readaptation | READ | 30/60/90  | -        | central | yes      | right | -      | no | on    |

No. of PM: number of pointing movements (30, 60 or 90 movements); No. of P: number of pictures; CP: chair position; CR: chin rest; AD: adaptation; READ: readaptation.
